# Supplementary material for: In Vitro Phytochemical Screening, Cytotoxicity Studies of Curcuma longa Extracts with Isolation and Characterisation of Their Isolated Compounds
Source: MDPI journal article supplement (doi:10.3390/molecules26247509), 2021-12-11
Supplement: s1 [file s1]

## Supplementary data

**Table S1: HPLC analysis of Curcuminoids**

| Peak | Reten. Time [min.] | Area     | Height [mV] | Area [%] | Height [%] |
|------|--------------------|----------|-------------|----------|------------|
| 1    | 1.973              | 11.920   | 0.842       | 0.2      | 0.1        |
| 2    | 2.143              | 11.821   | 1.053       | 0.2      | 0.1        |
| 3    | 2.407              | 22.049   | 1.503       | 0.3      | 0.2        |
| 4    | 2.923              | 646.001  | 53.343      | 8.6      | 6.3        |
| 5    | 3.363              | 32.571   | 2.637       | 0.4      | 0.3        |
| 6    | 3.770              | 6277.502 | 754.627     | 84.0     | 88.7       |
| 7    | 4.283              | 471.469  | 37.088      | 6.3      | 4.4        |
|      | Total              | 7473.333 | 851.092     | 100.0    | 100.0      |

**Table S2: The final yield of isolated Bisdemethoxycurcumin**

| S. No. | Composition               | Weight of extract[a] | Percentage (%) yield[a] |
|--------|---------------------------|----------------------|-------------------------|
| 1      | Bisdemethoxycurcumin (BD) | 368.5 mg             | 7.36%                   |

Where, [a] weight of Curcuminoids is 5 gm.

**Table S3: HPLC analysis of Bisdemethoxycurcumin**

| Peak  | Ret. Time | Area    | Height | Conc. (mg/L) |
|-------|-----------|---------|--------|--------------|
| 1     | 4.169     | 241710  | 50002  | 1.820        |
| 2     | 4.978     | 1223921 | 38082  | 98.120       |
| Total |           | 1465631 | 137856 | 100          |
